# Supplementary material for: Are assortative mating and genital divergence driven by reinforcement?
Source: PubMed Central journal article supplement (PMC6292706; doi:10.1002/evl3.85), 2018-10-16

A = length (1 to 8)  
D = length (1 to 5)  
E = length (5 to 8)

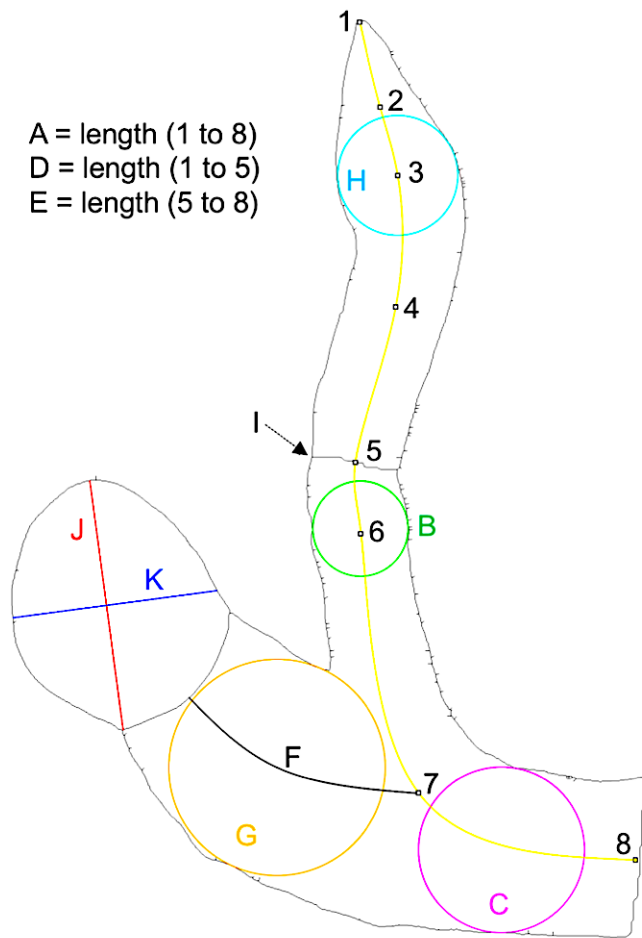

Supplement: EVL3-2-557-s001.pdf [file EVL3-2-557-s001.pdf]
