# Supplementary material for: Are assortative mating and genital divergence driven by reinforcement?
Source: PubMed Central journal article supplement (PMC6292706; doi:10.1002/evl3.85), 2018-10-16

## No migration (NM)

*L. cingulata*

*L. filosa*

allopatry      sympatry      allopatry

pop. 1      pop. 2      pop. 3      pop. 4

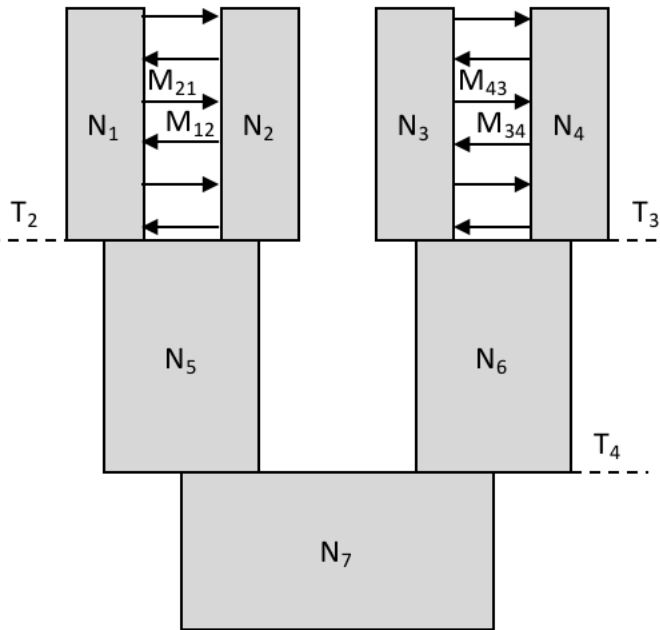

## Constant migration (CM)

*L. cingulata*

*L. filosa*

allopatry      sympatry      allopatry

pop. 1      pop. 2      pop. 3      pop. 4

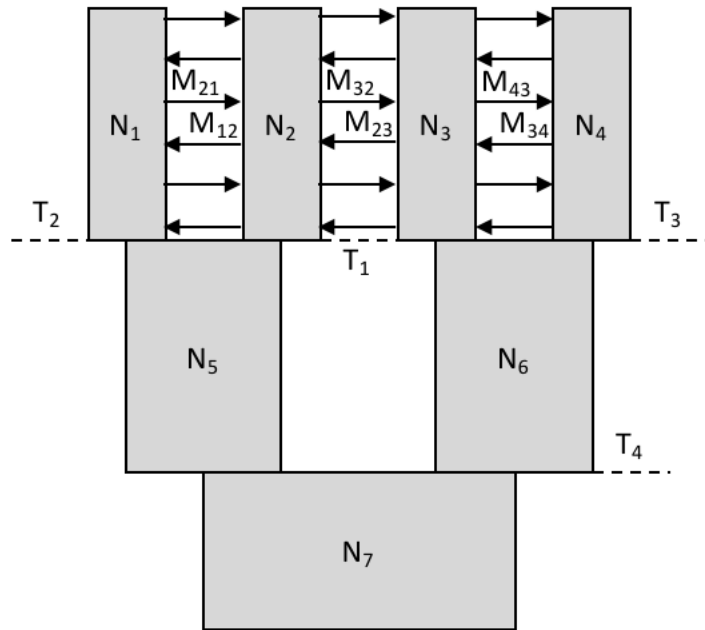

## Recent migration (RM)

*L. cingulata*

*L. filosa*

allopatry      sympatry      allopatry

pop. 1      pop. 2      pop. 3      pop. 4

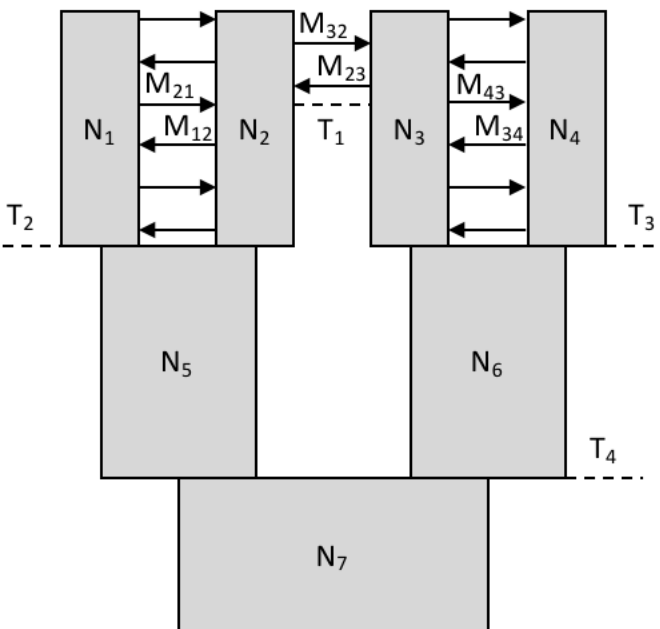

## Ancient migration (AM)

*L. cingulata*

*L. filosa*

allopatry      sympatry      allopatry

pop. 1      pop. 2      pop. 3      pop. 4

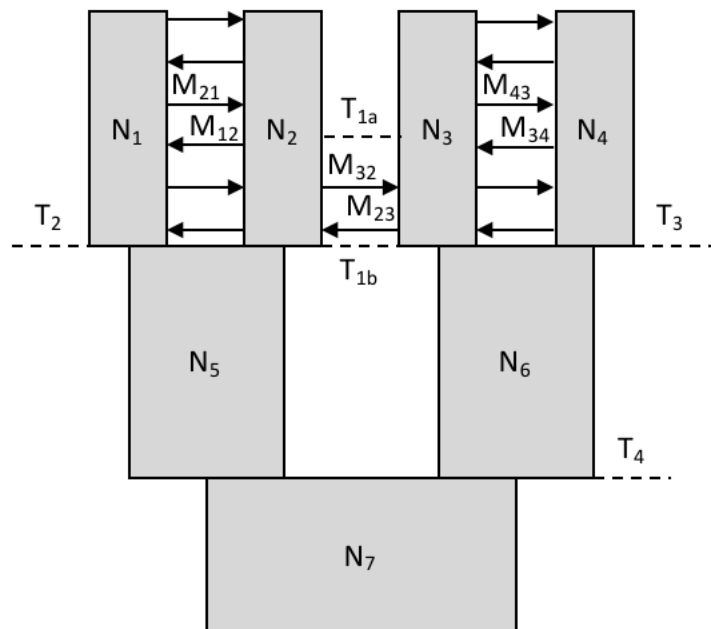

Supplement: EVL3-2-557-s002.pdf [file EVL3-2-557-s002.pdf]
