# Supplementary material for: Are assortative mating and genital divergence driven by reinforcement?
Source: PubMed Central journal article supplement (PMC6292706; doi:10.1002/evl3.85), 2018-10-16

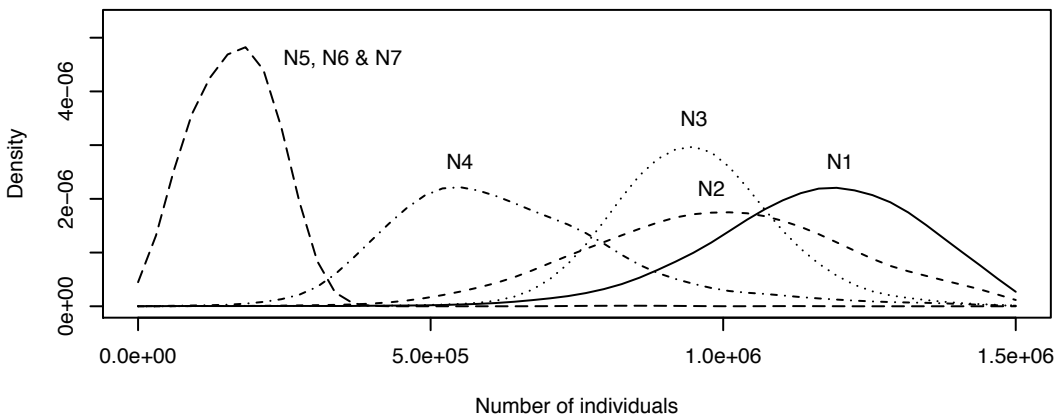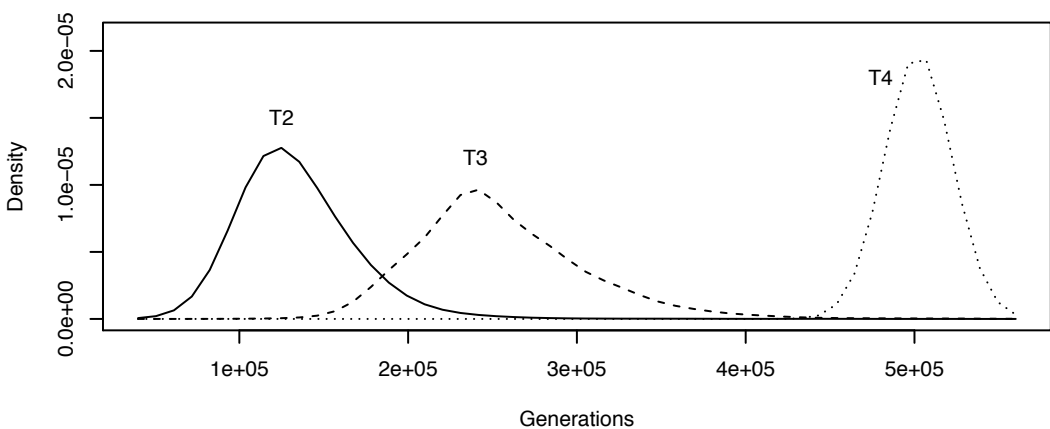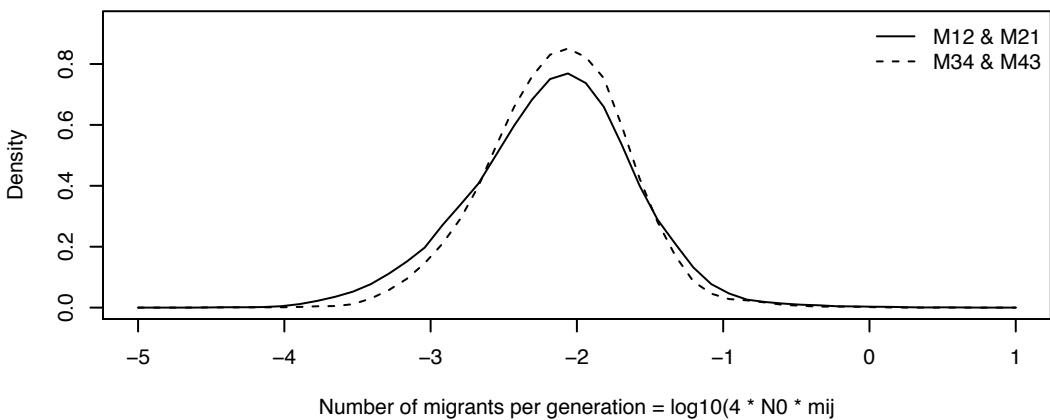

Supplement: EVL3-2-557-s006.pdf [file EVL3-2-557-s006.pdf]
